# Supplementary material
Source: MDPI journal article supplement (https://www.mdpi.com/2071-1050/11/20/5677)

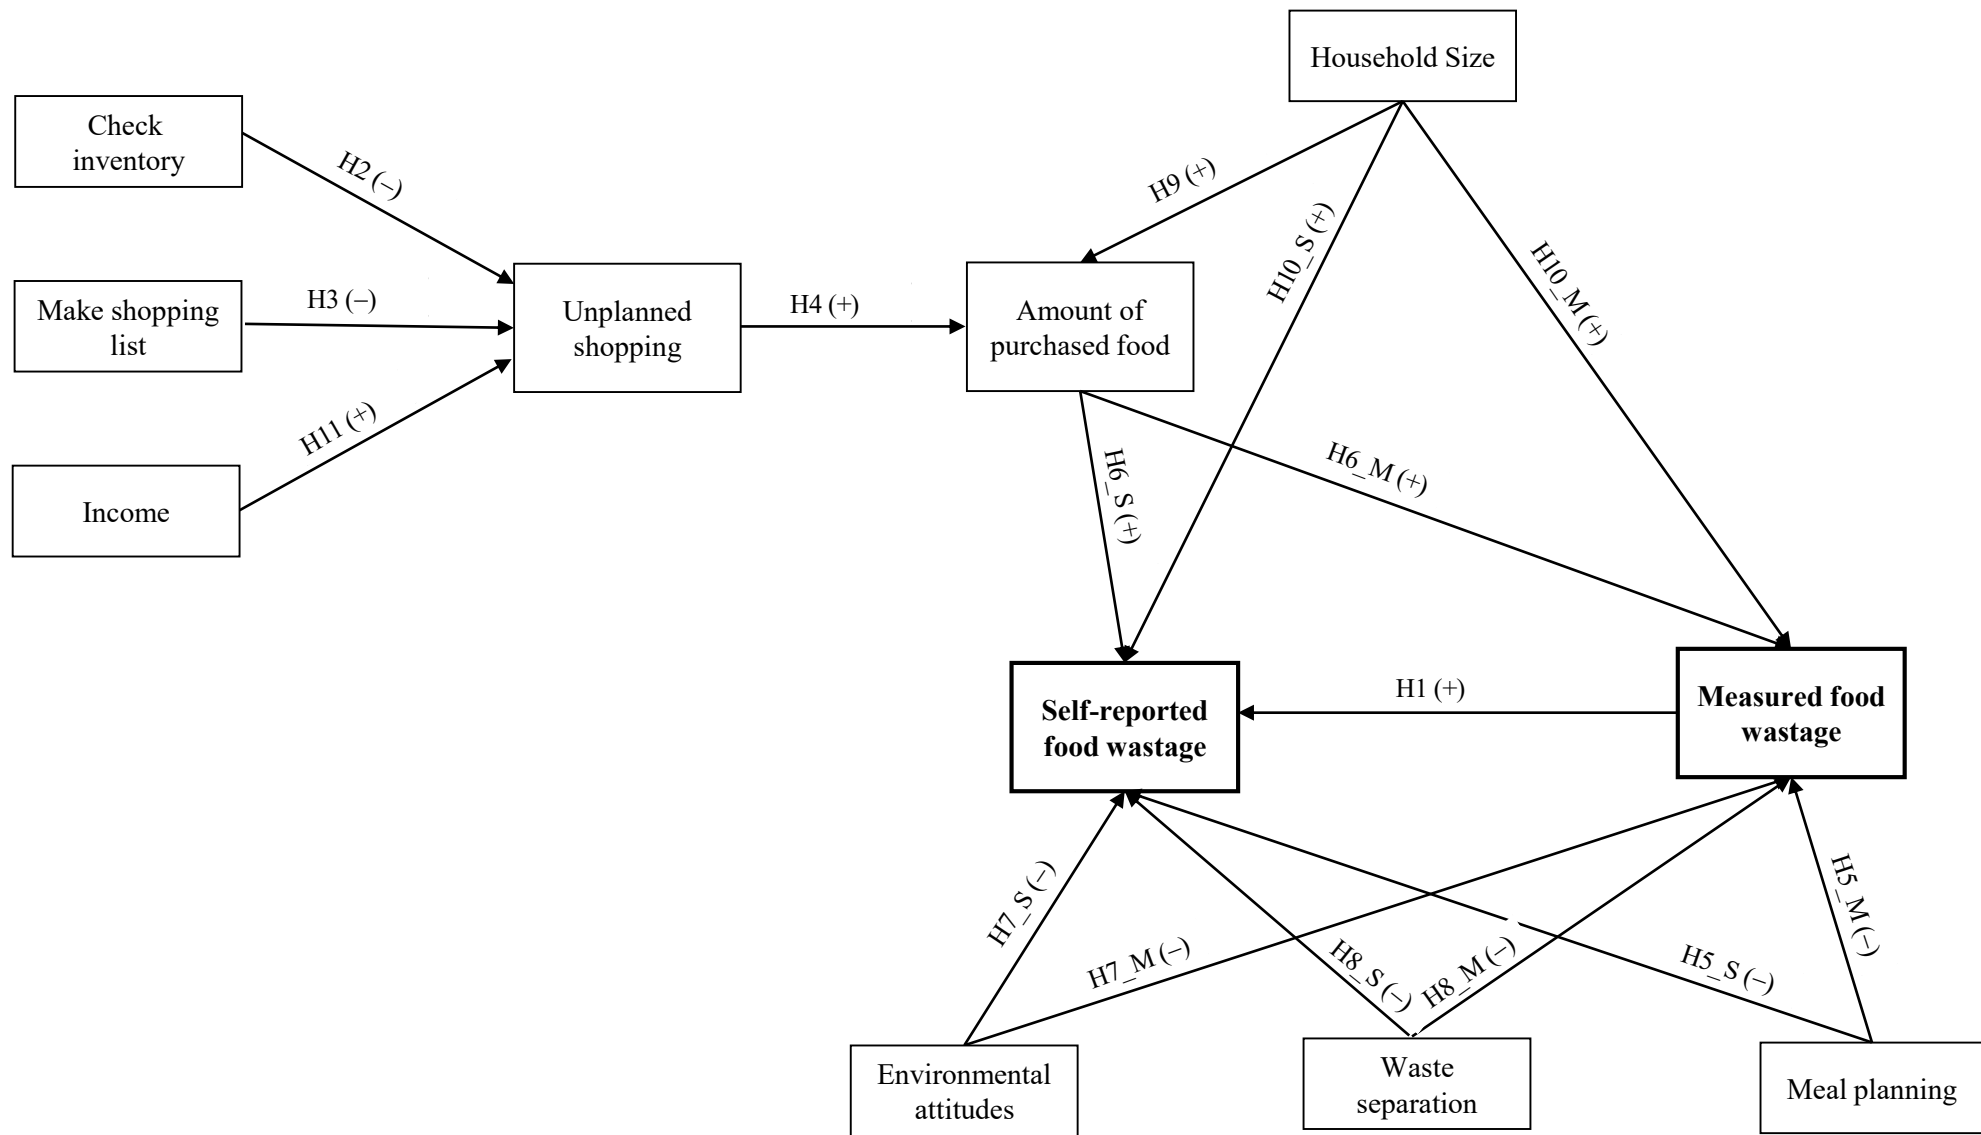

Supplement: s1 [file s1]

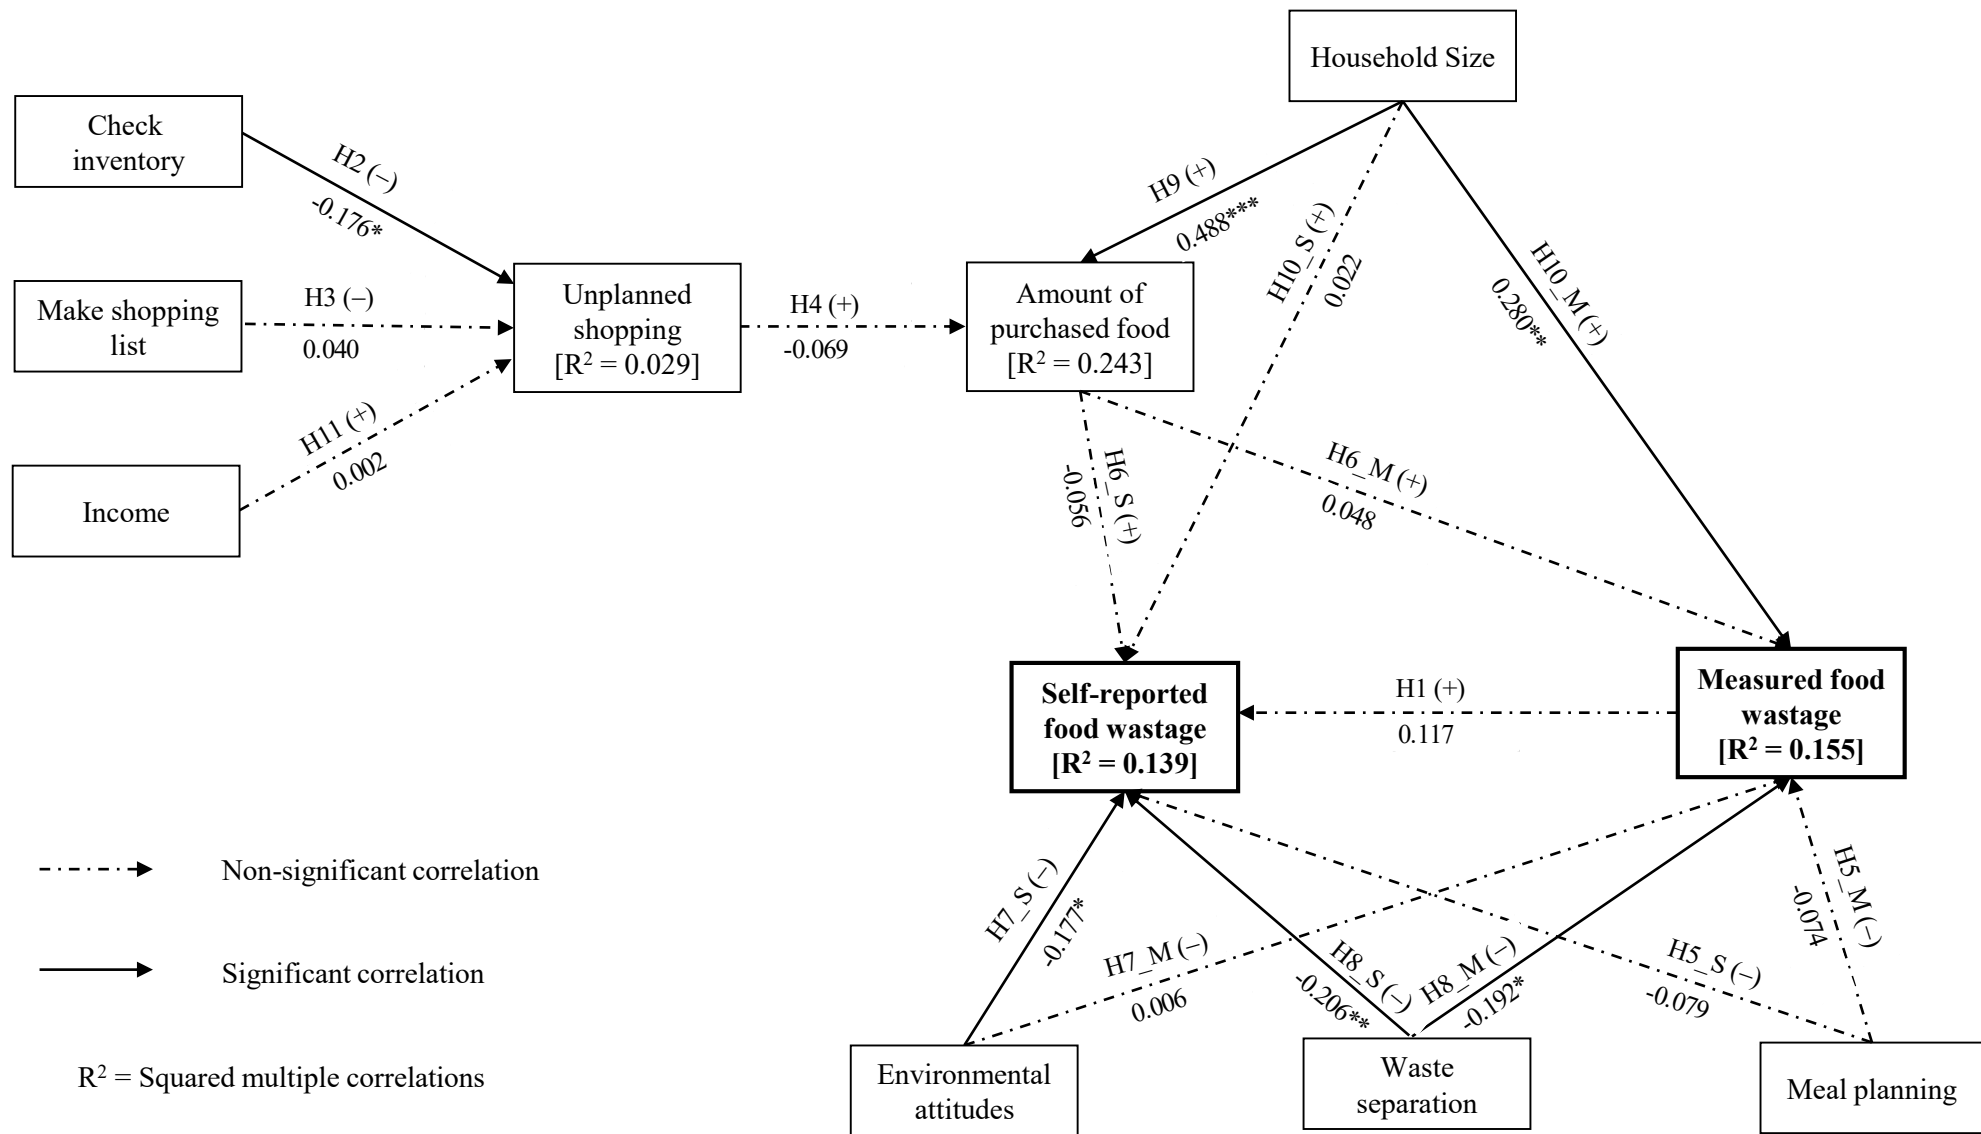

Supplement: s1 [file s1]
